# Supplementary material for: Group B streptococcus vaccination in pregnant women with or without HIV in Africa: a non-randomised phase 2, open-label, multicentre trial
Source: PubMed Central journal article supplement (PMC4835545; doi:10.1016/s1473-3099(15)00484-3), 2016-05

# THE LANCET Infectious Diseases

## Supplementary webappendix

This webappendix formed part of the original submission and has been peer reviewed. We post it as supplied by the authors.

Supplement to: Heyderman RS, Madhi SA, French N, et al. Group B streptococcus vaccination in pregnant women with or without HIV in Africa: a non-randomised phase 2, open-label, multicentre trial. *Lancet Infect Dis* 2016; published online Feb 8. [http://dx.doi.org/10.1016/S1473-3099\(15\)00484-3](http://dx.doi.org/10.1016/S1473-3099(15)00484-3).

**Supplementary Table 1: Causes of maternal and infant deaths**

| <b>Vaccine Group</b> | <b>Cause of death</b>                                                                                                                                                      | <b>Age at death (days)</b> | <b>Country</b> | <b>Relatedness to study vaccine</b> |
|----------------------|----------------------------------------------------------------------------------------------------------------------------------------------------------------------------|----------------------------|----------------|-------------------------------------|
| <b>Women</b>         |                                                                                                                                                                            |                            |                |                                     |
| HIV-infected CD4High | <ul style="list-style-type: none"> <li>▪ Disseminated intravascular coagulation</li> <li>▪ Hemorrhagic shock</li> <li>▪ Uterine rupture</li> </ul>                         | Study Day 72               | Malawi         | None                                |
| <b>Infants</b>       |                                                                                                                                                                            |                            |                |                                     |
| HIV-uninfected       | <ul style="list-style-type: none"> <li>▪ Neonatal asphyxia</li> </ul>                                                                                                      | 1                          | Malawi         | None                                |
| HIV-uninfected       | <ul style="list-style-type: none"> <li>▪ Hypoxic-ischemic encephalopathy</li> <li>▪ Neonatal asphyxia</li> <li>▪ Neonatal aspiration</li> <li>▪ Neonatal sepsis</li> </ul> | 1                          | Malawi         | None                                |
| HIV-infected CD4Low  | <ul style="list-style-type: none"> <li>▪ Chromosomal deletion</li> <li>▪ Neonatal asphyxia</li> <li>▪ Neonatal aspiration</li> </ul>                                       | 1                          | Malawi         | None                                |
| HIV-infected CD4Low  | <ul style="list-style-type: none"> <li>▪ Neonatal sepsis</li> </ul>                                                                                                        | 14                         | Malawi         | None                                |
| HIV-infected CD4Low  | <ul style="list-style-type: none"> <li>▪ Neonatal respiratory distress syndrome</li> <li>▪ Premature baby</li> </ul>                                                       | 1                          | Malawi         | None                                |
| HIV-infected CD4Low  | <ul style="list-style-type: none"> <li>▪ Neonatal respiratory distress syndrome</li> <li>▪ Premature baby</li> <li>▪ Petechiae</li> </ul>                                  | 1                          | Malawi         | None                                |
| HIV-infected CD4High | <ul style="list-style-type: none"> <li>▪ Stillbirth</li> </ul>                                                                                                             | 1                          | Malawi         | None                                |
| HIV-infected CD4High | <ul style="list-style-type: none"> <li>▪ Gastroenteritis</li> <li>▪ Hyponatremia</li> <li>▪ Metabolic acidosis</li> <li>▪ Renal impairment</li> <li>▪ Shock</li> </ul>     | 4                          | S. Africa      | None                                |

**Supplementary Table 2:** Number and percentage of women reporting pregnancy events and obstetric outcomes, by HIV status group

|                                               | <b>HIV-infected<br/>CD4Low<br/><i>n</i>=90</b> | <b>HIV-infected<br/>CD4High<br/><i>n</i>=89</b> | <b>HIV-<br/>uninfected<br/><i>n</i>=90</b> |
|-----------------------------------------------|------------------------------------------------|-------------------------------------------------|--------------------------------------------|
| <b><i>Pregnancy events</i></b>                |                                                |                                                 |                                            |
| Chorioamnionitis                              | 1 (1%)                                         | 0                                               | 0                                          |
| Cephalopelvic disproportion                   | 0                                              | 0                                               | 1 (1%)                                     |
| (Pre-) eclampsia                              | 0                                              | 1 (1%)                                          | 1 (1%)                                     |
| Failed induction                              | 1 (1%)                                         | 2 (2%)                                          | 0                                          |
| Fetal distress                                | 1 (1%)                                         | 0                                               | 0                                          |
| Gestational diabetes                          | 0                                              | 1 (1%)                                          | 0                                          |
| Lacerations/episiotomy                        | 24 (27%)                                       | 28 (31%)                                        | 28 (31%)                                   |
| Premature rupture of membranes                | 0                                              | 1 (1%)                                          | 0                                          |
| Prolonged labour                              | 0                                              | 1 (1%)                                          | 0                                          |
| Retained placenta and post-partum haemorrhage | 0                                              | 1 (1%)                                          | 0                                          |
| <b><i>Delivery Type</i></b>                   |                                                |                                                 |                                            |
| Caesarean                                     | 20 (22%)                                       | 15 (17%)                                        | 16 (18%)                                   |
| Vaginal                                       | 62 (69%)                                       | 68 (76%)                                        | 66 (73%)                                   |
| Vacuum                                        | 1 (1%)                                         | 0                                               | 1 (1%)                                     |
| Forceps or ventouse                           | 0                                              | 0                                               | 2 (2%)                                     |
| Not reported                                  | 7 (8%)                                         | 6 (7%)                                          | 5 (6%)                                     |
| <b><i>Infants</i></b>                         |                                                |                                                 |                                            |
|                                               | <i>n</i> =91                                   | <i>n</i> =88                                    | <i>n</i> =87                               |
| Live birth singletons                         | 85 (93%)                                       | 85 (97%)                                        | 85 (98%)                                   |
| Live birth twins                              | 6 (7%)                                         | 2 (2%)                                          | 2 (2%)                                     |
| Stillbirth                                    | 0                                              | 1 (1%)                                          | 0                                          |

**Supplementary Table 3:** Geometric mean GBS serotype Ia and III-specific antibody concentrations (GMCs) for HIV positive and HIV negative women, separated by baseline antibody status, relative to lower limit of quantification (LLQ). GMCs are expressed as  $\mu\text{g/mL}$  and 95% confidence intervals are given in parenthesis.

|                             | Baseline < LLQ                      |                                     |                                     | Baseline $\geq$ LLQ                 |                                     |                                     |
|-----------------------------|-------------------------------------|-------------------------------------|-------------------------------------|-------------------------------------|-------------------------------------|-------------------------------------|
|                             | HIV-infected<br>CD4Low              | HIV-infected<br>CD4High             | HIV-<br>uninfected                  | HIV-infected<br>CD4Low              | HIV-infected<br>CD4High             | HIV-<br>uninfected                  |
| <b>Serotype Ia</b>          |                                     |                                     |                                     |                                     |                                     |                                     |
| Day 1 pre-<br>vaccination   | 0.16<br>(0.16–0.16)<br><i>n</i> =72 | 0.16<br>(0.16–0.16)<br><i>n</i> =66 | 0.16<br>(0.16–0.16)<br><i>n</i> =62 | 0.98<br>(0.58–1.65)<br><i>n</i> =18 | 0.67<br>(0.41–1.11)<br><i>n</i> =23 | 1.81<br>(1.24–2.64)<br><i>n</i> =28 |
| Day 15 post-<br>vaccination | 1.03<br>(0.63–1.69)<br><i>n</i> =65 | 1.29<br>(0.77–2.15)<br><i>n</i> =61 | 1.83<br>(1.09–3.08)<br><i>n</i> =59 | 41<br>(19–90)<br><i>n</i> =17       | 20<br>(9.63–41)<br><i>n</i> =23     | 105<br>(61–180)<br><i>n</i> =28     |
| Day 31 post-<br>vaccination | 1.04<br>(0.63–1.69)<br><i>n</i> =66 | 1.40<br>(0.85–2.32)<br><i>n</i> =57 | 2.30<br>(1.39–3.81)<br><i>n</i> =56 | 41<br>(21–80)<br><i>n</i> =17       | 22<br>(12–41)<br><i>n</i> =23       | 105<br>(66–166)<br><i>n</i> =28     |
| Delivery                    | 1.0<br>(0.66–1.51)<br><i>n</i> =68  | 1.11<br>(0.71–1.75)<br><i>n</i> =58 | 1.77<br>(1.12–2.79)<br><i>n</i> =56 | 35<br>(16–77)<br><i>n</i> =15       | 18<br>(9–34)<br><i>n</i> =23        | 61<br>(37–101)<br><i>n</i> =27      |
| <b>Serotype III</b>         |                                     |                                     |                                     |                                     |                                     |                                     |
| Day 1 pre-<br>vaccination   | 0.04<br>(0.04–0.04)<br><i>n</i> =22 | 0.04<br>(0.04–0.04)<br><i>n</i> =33 | 0.04<br>(0.04–0.04)<br><i>n</i> =33 | 0.22<br>(0.17–0.30)<br><i>n</i> =43 | 0.25<br>(0.19–0.33)<br><i>n</i> =44 | 0.28<br>(0.22–0.37)<br><i>n</i> =49 |
| Day 15 post-<br>vaccination | 0.4<br>(0.19–0.82)<br><i>n</i> =21  | 0.4<br>(0.22–0.74)<br><i>n</i> =30  | 1.66<br>(0.92–3.02)<br><i>n</i> =31 | 2.46<br>(1.23–4.89)<br><i>n</i> =39 | 2.96<br>(1.49–5.88)<br><i>n</i> =37 | 16<br>(8.7–29)<br><i>n</i> =48      |
| Day 31 post-<br>vaccination | 0.45<br>(0.22–0.90)<br><i>n</i> =21 | 0.39<br>(0.21–0.70)<br><i>n</i> =30 | 1.59<br>(0.89–2.86)<br><i>n</i> =30 | 3.29<br>(1.66–6.49)<br><i>n</i> =38 | 1.97<br>(1.01–3.83)<br><i>n</i> =37 | 14<br>(7.53–25)<br><i>n</i> =46     |
| Delivery                    | 0.41<br>(0.22–0.76)<br><i>n</i> =21 | 0.39<br>(0.23–0.65)<br><i>n</i> =32 | 1.12<br>(0.66–1.90)<br><i>n</i> =29 | 1.87<br>(0.98–3.55)<br><i>n</i> =40 | 1.79<br>(0.88–3.64)<br><i>n</i> =31 | 8.84<br>(4.93–16)<br><i>n</i> =46   |

Note: analysis not performed for serotype Ib as too few women had a baseline GMC < LLQ

**Supplementary Table 4:** Geometric mean antibody concentrations (95% confidence intervals) by HIV status and site.

|                            | HIV-infectedCD4Low               |                                    | HIV-infectedCD4High               |                                   | HIV-uninfected                   |                                   |
|----------------------------|----------------------------------|------------------------------------|-----------------------------------|-----------------------------------|----------------------------------|-----------------------------------|
|                            | S. Africa                        | Malawi                             | S. Africa                         | Malawi                            | S. Africa                        | Malawi                            |
| <b>Serotype Ia</b>         |                                  |                                    |                                   |                                   |                                  |                                   |
| Day 1<br>(pre-vaccination) | 0.34 (0.24–0.50)<br><i>n</i> =45 | 0.17 (0.15–0.20)<br><i>n</i> =45   | 0.37 (0.25–0.54)<br><i>n</i> =45  | 0.17 (0.14–0.20)<br><i>n</i> =44  | 0.48 (0.33–0.70)<br><i>n</i> =45 | 0.26 (0.22–0.31)<br><i>n</i> =45  |
| Day 15<br>post-vaccination | 5.14 (2.90–9.12)<br><i>n</i> =45 | 1.25 (0.65–2.40)<br><i>n</i> =37   | 6.13 (3.46–11.0)<br><i>n</i> =45  | 1.35 (0.71–2.56)<br><i>n</i> =39  | 10 (5.77–18)<br><i>n</i> =45     | 1.73 (0.92–3.26)<br><i>n</i> =42  |
| Day 31<br>post-vaccination | 4.60 (2.75–7.69)<br><i>n</i> =45 | 1.44 (0.78–2.66)<br><i>n</i> =38   | 6.63 (3.97–11.0)<br><i>n</i> =45  | 1.49 (0.79–2.82)<br><i>n</i> =35  | 11 (6.68–19)<br><i>n</i> =45     | 2.19 (1.17–4.11)<br><i>n</i> =39  |
| Delivery                   | 4.34 (2.66–7.09)<br><i>n</i> =43 | 1.05 (0.61–1.81)<br><i>n</i> =40   | 5.02 (3.11–8.11)<br><i>n</i> =45  | 1.09 (0.62–1.91)<br><i>n</i> =36  | 7.28 (4.43–12)<br><i>n</i> =42   | 1.74 (1.01–3.01)<br><i>n</i> =41  |
| <b>Serotype Ib</b>         |                                  |                                    |                                   |                                   |                                  |                                   |
| Day 1<br>(pre-vaccination) | 0.52 (0.37–0.74)<br><i>n</i> =34 | 0.46 (0.31–0.66)<br><i>n</i> =29   | 0.42 (0.30–0.59)<br><i>n</i> =38  | 0.31 (0.22–0.43)<br><i>n</i> =32  | 0.46 (0.33–0.65)<br><i>n</i> =35 | 0.37 (0.27–0.50)<br><i>n</i> =42  |
| Day 15<br>post-vaccination | 2.51 (1.41–4.48)<br><i>n</i> =40 | 2.39 (1.00–5.71)<br><i>n</i> =30   | 2.70 (1.57–4.66)<br><i>n</i> =42  | 3.45 (1.58–7.55)<br><i>n</i> =34  | 5.24 (3.04–9.02)<br><i>n</i> =44 | 7.45 (3.95–14)<br><i>n</i> =40    |
| Day 31<br>post-vaccination | 1.85 (1.11–3.06)<br><i>n</i> =41 | 1.70 (0.83–3.50)<br><i>n</i> =34   | 2.82 (1.73–4.60)<br><i>n</i> =43  | 2.82 (1.39–5.73)<br><i>n</i> =34  | 4.20 (2.55–6.90)<br><i>n</i> =45 | 5.86 (3.29–10)<br><i>n</i> =39    |
| Delivery                   | 1.80 (1.09–2.97)<br><i>n</i> =36 | 1.87 (0.95–3.70)<br><i>n</i> =38   | 2.68 (1.71–4.19)<br><i>n</i> =43  | 2.02 (1.06–3.86)<br><i>n</i> =37  | 2.97 (1.86–4.75)<br><i>n</i> =42 | 5.29 (3.06–9.15)<br><i>n</i> =40  |
| <b>Serotype III</b>        |                                  |                                    |                                   |                                   |                                  |                                   |
| Day 1<br>(pre-vaccination) | 0.17 (0.11–0.25)<br><i>n</i> =40 | 0.092 (0.061–0.14)<br><i>n</i> =25 | 0.11 (0.073–0.16)<br><i>n</i> =40 | 0.11 (0.082–0.16)<br><i>n</i> =37 | 0.16 (0.11–0.23)<br><i>n</i> =44 | 0.11 (0.076–0.15)<br><i>n</i> =38 |
| Day 15<br>post-vaccination | 1.25 (0.75–2.08)<br><i>n</i> =42 | 1.66 (0.74–3.71)<br><i>n</i> =34   | 1.93 (1.14–3.28)<br><i>n</i> =41  | 0.89 (0.45–1.73)<br><i>n</i> =36  | 8.77 (5.41–14)<br><i>n</i> =45   | 4.10 (2.21–7.63)<br><i>n</i> =41  |
| Day 31<br>post-vaccination | 1.35 (0.79–2.28)<br><i>n</i> =42 | 2.26 (1.07–4.78)<br><i>n</i> =36   | 1.34 (0.78–2.30)<br><i>n</i> =42  | 0.77 (0.41–1.44)<br><i>n</i> =35  | 6.58 (4.03–11)<br><i>n</i> =45   | 4.35 (2.38–7.95)<br><i>n</i> =37  |

---

|          |                                  |                                  |                                  |                                  |                                  |                                  |
|----------|----------------------------------|----------------------------------|----------------------------------|----------------------------------|----------------------------------|----------------------------------|
| Delivery | 1.10 (0.68–1.77)<br><i>n</i> =43 | 1.09 (0.53–2.24)<br><i>n</i> =40 | 1.32 (0.80–2.20)<br><i>n</i> =39 | 0.72 (0.37–1.37)<br><i>n</i> =33 | 4.20 (2.63–6.73)<br><i>n</i> =42 | 2.92 (1.64–5.22)<br><i>n</i> =40 |
|----------|----------------------------------|----------------------------------|----------------------------------|----------------------------------|----------------------------------|----------------------------------|

---

**Supplementary Figure 1:** Boxplots of individual maternal antibody concentrations against each serotype at baseline and delivery.

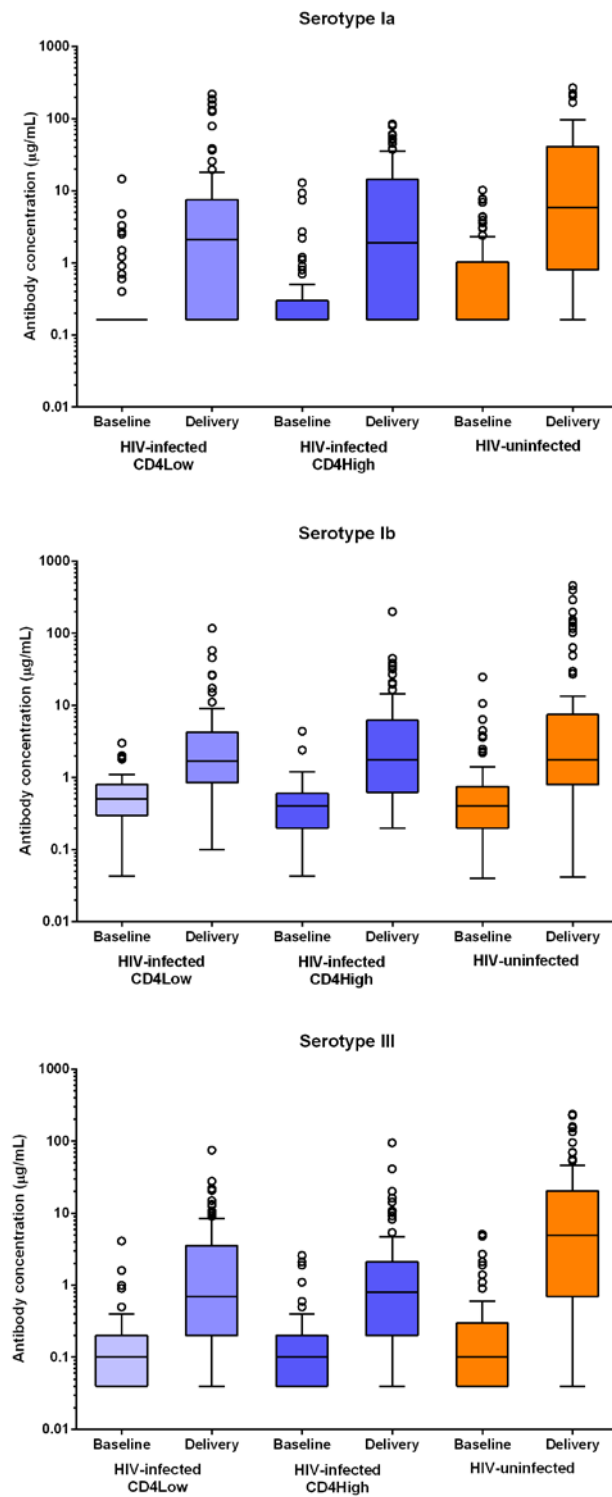

Supplement: mmc1.pdf [file mmc1.pdf]
